# Supplementary material
Source: Copernicus journal article supplement (doi:10.5194/gmd-19-4031-2026)
Supplement: Supplementary file 1 [file gmd-19-4031-2026-supplement.pdf]

Supplement of Geosci. Model Dev., 19, 4031–4054, 2026  
<https://doi.org/10.5194/gmd-19-4031-2026-supplement>  
© Author(s) 2026. CC BY 4.0 License.

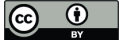

*Supplement of*

## **Love number computation within the Ice-sheet and Sea-level System Model (ISSM v4.24)**

**Lambert Caron et al.**

*Correspondence to:* Lambert Caron ([lambert.caron@jpl.nasa.gov](mailto:lambert.caron@jpl.nasa.gov))

The copyright of individual parts of the supplement might differ from the article licence.

780 **S1: Alternative analytical form of hypergeometric functions for EBM rheology**

This supplement describes a simple procedure to be implemented for the hypergeometric function,  $\Upsilon = {}_2F_1[1, 1 + \alpha; 2 + \alpha; z]$ ;  $z = -s\tau_{H,L}$  for the extended Burgers Material model with  $0 < \alpha < 1$  without requiring a function call to software for the general case of the hypergeometric function. The main purpose of avoiding such a function call is to gain some computational efficiency by tailoring the replacement to the detailed requirements of the EBM/GIA ensemble for Bayesian analysis. While  
 785 past experience suggests that the  $\alpha$ -dependency is weak, further testing is required. A method relied upon here is to employ Mathematica software.

For example, Mathematica returns the specific case of  $\alpha = \frac{1}{2}$ :

$${}_2F_1\left[1, \frac{3}{2}; \frac{5}{2}; z\right] = \frac{3(-z + \sqrt{2}\text{ArcTan}\sqrt{z})}{z^2}. \quad (\text{S1})$$

We remind the reader that all actions on the variable,  $z$ , for transcendental equations assume complex computation, and  
 790 similarly for the hypergeometric function. There are no straightforward simplifications for  ${}_2F_1$  offered by Mathematica 13.1, or earlier versions. Furthermore no useful reductions may be derived from Abramowitz and Stegun (1970) in any obvious way. The functions  ${}_2F_1[a, b; c; z]$  may be recovered from the following definition

$${}_2F_1[a, b; c; z] \equiv \frac{\Gamma(c)}{\Gamma(a)\Gamma(b)} \sum_{p=0}^{\infty} \frac{\Gamma(a+p)\Gamma(b+p)}{\Gamma(c+p)} \frac{z^p}{p!}. \quad (\text{S2})$$

where  $\Gamma$  represents the Gamma function,  $p$  is an integer and the mark ! indicating factorial. However, the functions are also a  
 795 special solution of the equation:

$$z(1-z)\frac{d^2\Upsilon}{dz^2} + [c - (a+b+1)z]\frac{d\Upsilon}{dz} - ab\Upsilon = 0. \quad (\text{S3})$$

This equation is sometimes called Gauss' differential equation. Solutions have three regular points [e.g., Wylie 1966, p. 653, Mathews and Walker 1970, p. 187];  $z = 0, 1, \infty$ . The solution  ${}_2F_1[a, b; c; z]$  behaves as a constant near  $z = 0$ . If this constant is equal to unity, we formally arrive at the hypergeometric function  ${}_2F_1$ .

800 We may treat  $\alpha$  as a ratio of two integers,  $m$  and  $n$  where  $m < n$ , and both  $n$  and  $m$  are positive. In our case  $a = 1$ ,  $b = (n+m)/n$  and  $c = (2n+m)/n$ . There is no advantage to this substitution other than it provides a way to solve special cases of the one point boundary value problem

$$nz(1-z)\frac{d^2\Upsilon}{dz^2} + [2n+m - (3n+m)z]\frac{d\Upsilon}{dz} - (n+m)\Upsilon = 0, \quad (\text{S4})$$

with the condition

$$805 \quad \Upsilon(0) = 1. \quad (\text{S5})$$

For example, when  $m = 1, n = 4$  ( $\alpha = \frac{1}{4}$ ), then the solution for  $\Upsilon(z)$  is

$$\Upsilon(z) = -\frac{5}{2z^{\frac{5}{4}}} \cdot \{2z^{\frac{1}{4}} - \text{ArcTan}[z^{\frac{1}{4}}] - \text{ArcTanh}[z^{\frac{1}{4}}]\}. \quad (\text{S6})$$

Possibly a more illustrative example is when  $m = 1, n = 3$  ( $\alpha = \frac{1}{3}$ ). A more complicated expression is generated. The solution is

$$810 \quad \Upsilon(z) = -\frac{2}{9z^{\frac{4}{3}}} \cdot \{(\sqrt{3} - 6i)\pi + 3(6z^{\frac{1}{3}} - 2\sqrt{3}\text{ArcTan}[\frac{2z^{\frac{1}{3}} + 1}{\sqrt{3}}] + 2\ln[z^{\frac{1}{3}} - 1] - \ln[z^{\frac{1}{3}} + z^{\frac{2}{3}} + 1])\} \quad (S7)$$

where  $i$  is the imaginary unit  $\sqrt{-1}$ . Clearly, complex arithmetic should be fully implemented when using the simplifications owing to a Gauss' differential equation solution method for generating the special cases that arise in the power law distribution function of EBM theory. Figure S1 shows a comparison of the two methods, one which we term 'exact' is obtained in a function call in Mathematica computing language and the Gauss' differential equation method for the case  $\alpha = \frac{1}{3}$ . Some of the  
815 expressions generated by this method are more complicated than in our two examples, but these will always be more efficient than general call to functions generating  ${}_2F_1[1, 1 + \alpha; 2 + \alpha; -\tau_j s / \tau_M]$ . This is especially important due to the necessity of inverting the Laplace transforms numerically in order to generate time-dependent GIA solutions.

While transcendental equations and hypergeometric functions assume complex argument, computation of the imaginary parts reveal they are numerically near zero. EBM cases for  $\alpha = \frac{1}{3}$ , for example, reveal the following results using the Gauss  
820 method;

$$\Upsilon(-10001.0) = 0.000377533 + 1.6263 \times 10^{-19}i, \quad (S8)$$

$$\Upsilon(-.0001) = 0.999943 - 2.63911 \times 10^{-11}i, \quad (S9)$$

with the default precision in Mathematica on a MacBook Pro with Apple M1 Max chip.

825 In addition to the cases of  $\alpha$  at values  $\frac{1}{4}, \frac{1}{3}, \frac{1}{2}$ , as discussed here, we also give three additional solutions using the Gauss differential equation method. Case  $\alpha = \frac{1}{8}$  has the solution

$$\begin{aligned} \Upsilon(z) = & -\frac{9}{z} + \frac{9}{16z^{\frac{9}{8}}} \{ \sqrt{2}(\pi + 2\text{ArcCoth}[\frac{1+z^{\frac{1}{4}}}{\sqrt{2}z^{\frac{1}{8}}}]) \\ & + 4(\text{ArcTan}[z^{\frac{1}{8}}] + \text{ArcTanh}[z^{\frac{1}{8}}]) + 2\sqrt{2}\text{ArcTanh}[\frac{\sqrt{2}z^{\frac{1}{8}}}{1+z^{\frac{1}{8}}}] \}. \end{aligned} \quad (S10)$$

Case  $\alpha = \frac{2}{3}$  has the solution

$$830 \quad \Upsilon(z) = -\frac{1}{18z^{\frac{5}{3}}} \cdot \{(\sqrt{3} - 6i)\pi + 9z^{\frac{2}{3}} + \text{ArcTan}[\frac{1+2z^{\frac{1}{3}}}{\sqrt{3}}] + 3(2\ln[-1+z^{\frac{1}{3}}] - \ln[1+z^{\frac{1}{3}}+z^{\frac{2}{3}}])\}, \quad (S11)$$

and case  $\alpha = \frac{3}{4}$ , the solution;

$$\Upsilon(z) = -\frac{7}{6z^{\frac{7}{4}}} \cdot \{2z^{\frac{3}{4}} + 3(\text{ArcTan}[z^{\frac{1}{4}}] - \text{ArcTanh}[z^{\frac{1}{4}}])\}. \quad (S12)$$

It is also possible to pursue an examination of the case of  $\alpha = 0$  by taking the limit of the  $\alpha$ -dependent part of Equation (19)  
835 of Ivins et al [2022]. This leads to a form that contains the sum on the low and high cutoff times ( $\tau_L$  and  $\tau_H$ ) of  $Ei[-t/\tau_j]$

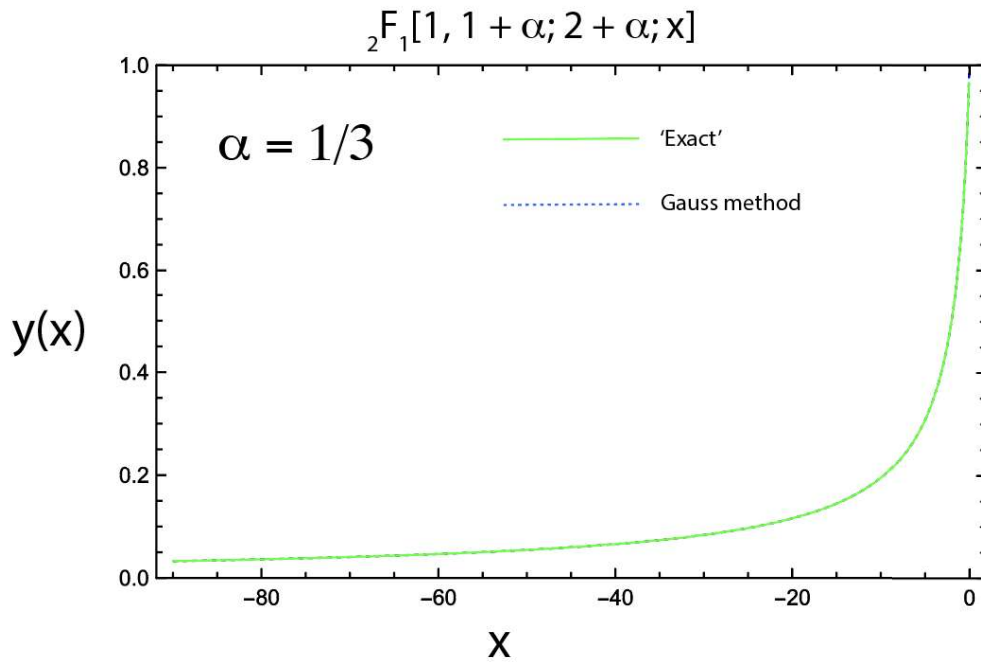

**Figure S1.** A comparison of the hypergeometric function computation options required of EBM/GIA.

with sum on the two cutoff times,  $\tau_j$ . To complete this solution for  $\alpha = 0$ , then requires convolving the load function with this exponential integral function,  $Ei[-t/\tau_j]$ , a task we can leave to the reader. It is noted that laboratory torsion experimental values of  $\alpha$  are all larger than  $\frac{1}{8}$ .

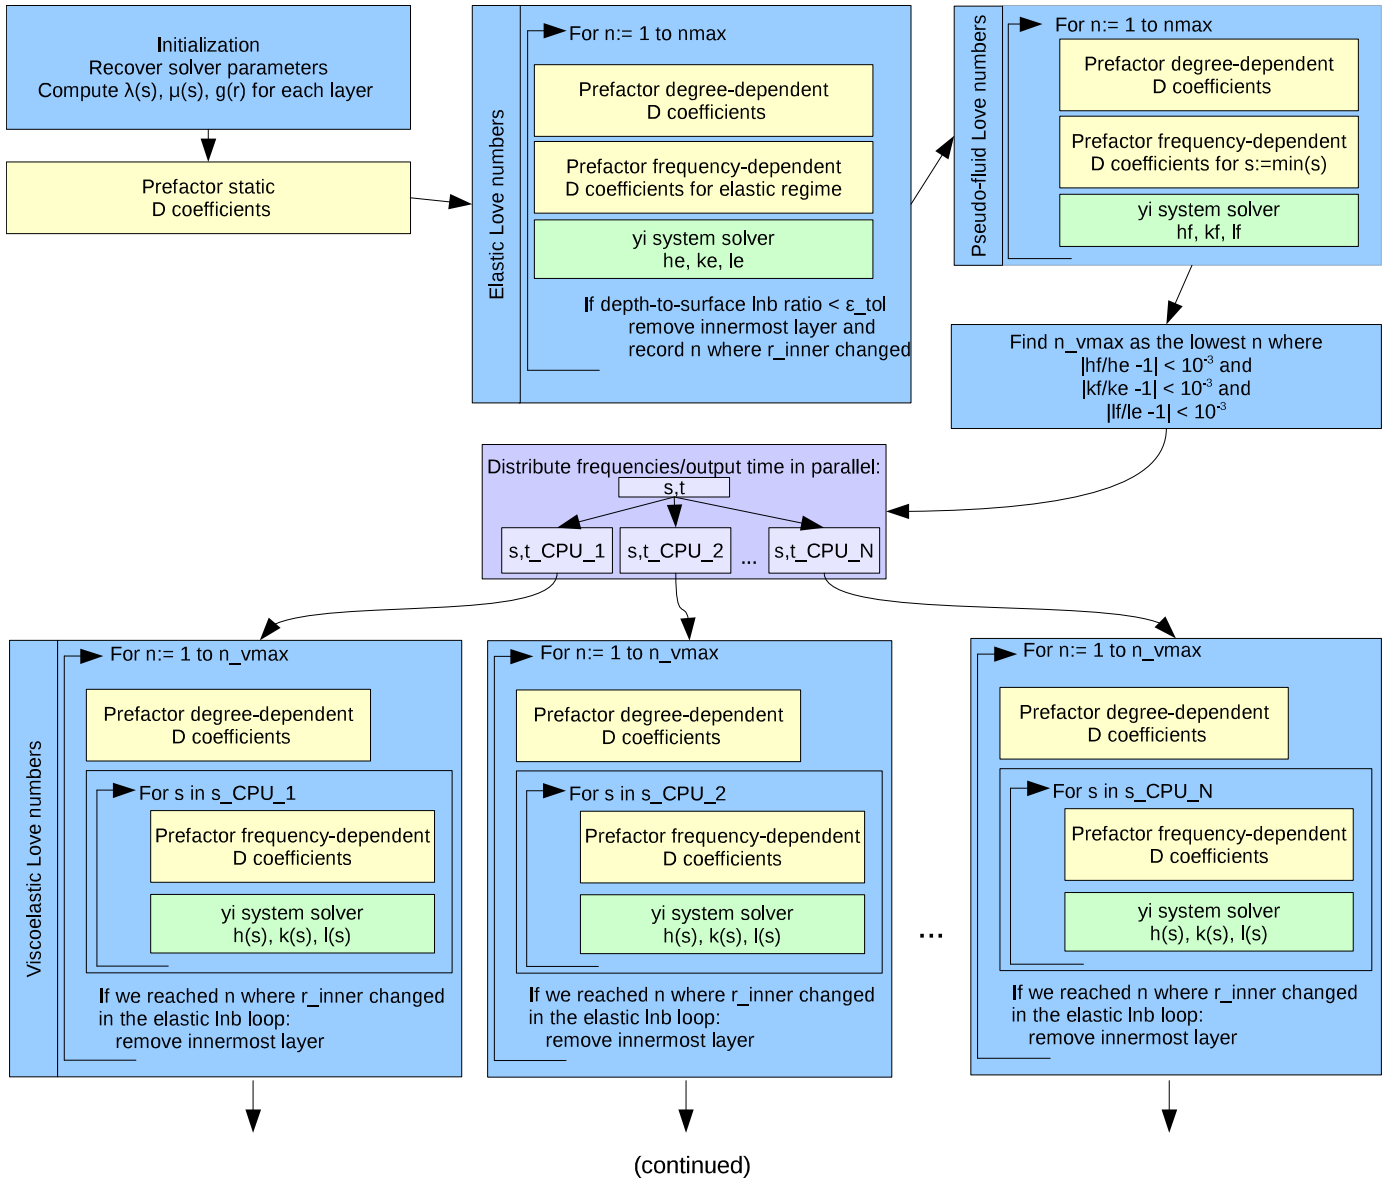

**Figure S2.** Flowchart of the Love number solver algorithm in its fully optimized form. Yellow boxes indicate optimization steps where prefactoring of matrix  $\bar{D}$  coefficients is computed. "Lnb" is short for Love numbers. Green boxes indicate that the resolution of the  $y_i$  system is performed (see fig. S3). Boxes in dark blue indicate where the Post-Widder algorithm for inverse Laplace Transform is applied. Purple boxes indicate steps where communication between CPUs in the parallelization process is occurring. All other operations are indicated by blue boxes.

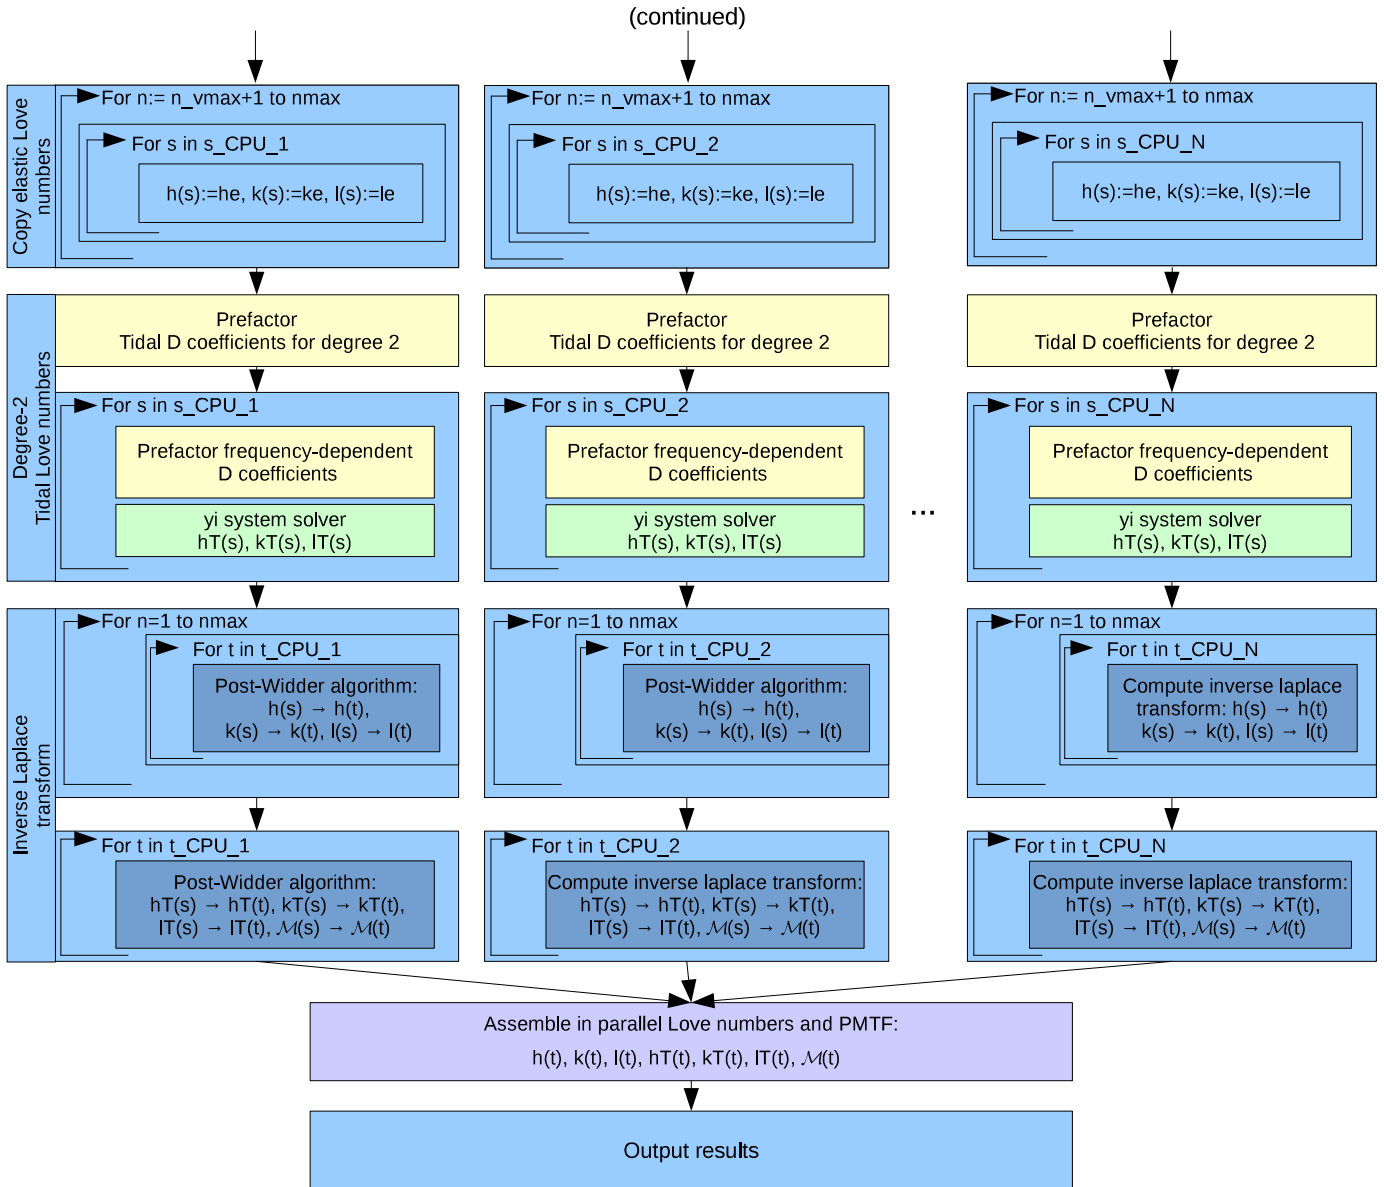

**Figure S2.** Flowchart of the Love number solver algorithm (continued).

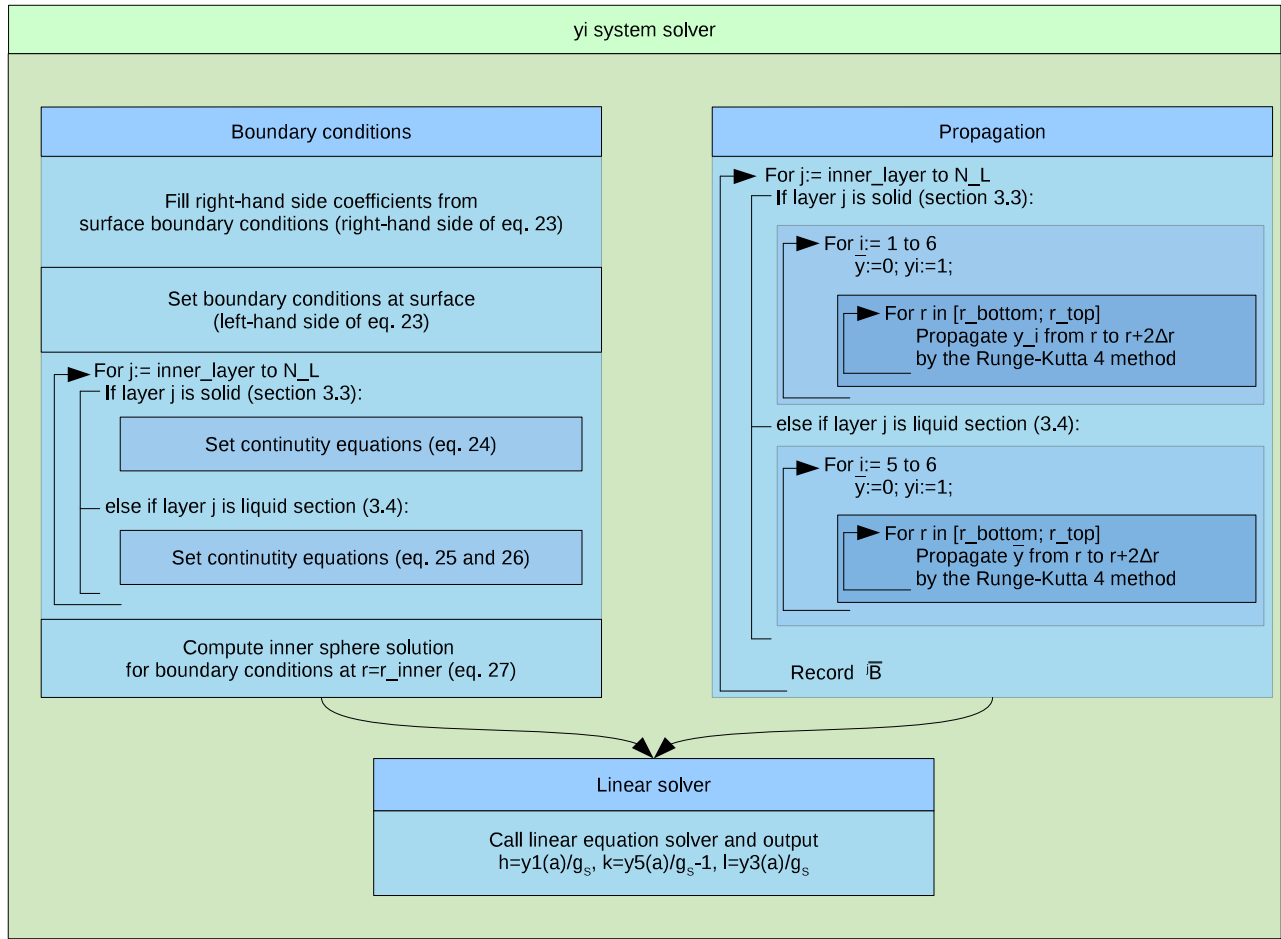

**Figure S3.** Flowchart of the  $y_i$  system solver algorithm for a given degree and frequency. Box headers indicate the categories in which computation times are reported in table 4.
